# Supplementary material for: The Pharmacokinetics of Levetiracetam in Critically Ill Adult Patients: An Intensive Care Unit Clinical Study
Source: MDPI journal article supplement (doi:10.3390/app12031208), 2022-01-24
Supplement: s1 [file s1]

## Supplementary Material

**Table S1.** Previously published population pharmacokinetic modeling results for levetiracetam.

| Clinical study                 | Spencer et al., 2011 | Karatza et al., 2020            | Hernandez-Mitre et al., 2020 | Rhee et al., 2017 | Sime et al., 2021                                                                                                                | Pigeolet et al., 2007               | Ito et al., 2016            | Chhun et al., 2009    | Toublanc et al., 2008                     |
|--------------------------------|----------------------|---------------------------------|------------------------------|-------------------|----------------------------------------------------------------------------------------------------------------------------------|-------------------------------------|-----------------------------|-----------------------|-------------------------------------------|
| <b>Patient population</b>      | Adult ICU            | Adults with persistent epilepsy | Epileptic adults             | Epileptic adults  | Critically ill adult patients with severe traumatic brain injury or aneurysmal subarachnoid hemorrhage without renal dysfunction | 86 healthy και 438 epileptic adults | Children - adults - elderly | Children 4 - 16 years | Children with epilepsy, 3 months-18 years |
| <b>Sample size</b>             | 12                   | 8                               | 107                          | 425               | 30                                                                                                                               | 524                                 | 225                         | 44                    | 228                                       |
| <b>Route of administration</b> | IV (ss)              | oral (ss)                       | oral (ss)                    | oral (ss)         | 16 patients received oral doses and the remaining 14 received intermittent IV infusion over 15 min                               | oral                                | oral                        | oral (ss)             | oral                                      |
| <b>Software</b>                | Boomer               | Monolix                         | NONMEM                       | NONMEM            | Pmetrics                                                                                                                         | NONMEM                              | NONMEM                      | NONMEM                | NONMEM                                    |

|                                          |                                                        |                                                                            |                                                                             |                                                                                 |                                                                                                                                                                                     |                                                                                                                                            |                                                                                                                                   |                                                                          |                                                                          |
|------------------------------------------|--------------------------------------------------------|----------------------------------------------------------------------------|-----------------------------------------------------------------------------|---------------------------------------------------------------------------------|-------------------------------------------------------------------------------------------------------------------------------------------------------------------------------------|--------------------------------------------------------------------------------------------------------------------------------------------|-----------------------------------------------------------------------------------------------------------------------------------|--------------------------------------------------------------------------|--------------------------------------------------------------------------|
| <b>Pharmacokinetic structural model</b>  | two-compartment with first order elimination           | one-compartment with first order absorption and elimination                | one-compartment with first order absorption and elimination                 | one-compartment with first order absorption and elimination                     | two-compartment with first-order oral absorption                                                                                                                                    | one-compartment with first order absorption and elimination                                                                                | one-compartment with first order absorption and elimination                                                                       | one-compartment with first order absorption and elimination              | one-compartment with first order absorption and elimination              |
| <b>Residual error model</b>              | NA                                                     | proportional                                                               | proportional                                                                | additive                                                                        | additive                                                                                                                                                                            | proportional                                                                                                                               | proportional                                                                                                                      | proportional                                                             | proportional                                                             |
| <b>Pharmacokinetic estimates</b>         | V = 17.1 l<br>V <sub>ss</sub> = 36.8 l<br>Cl = 5.6 l/h | K <sub>a</sub> = 0.616 h <sup>-1</sup><br>V/F = 34.7 l<br>Cl/F = 3.26 l/h  | K <sub>a</sub> = 3.63 h <sup>-1</sup><br>V/F = 29.7 l<br>Cl/F = 2.74 l/h    | K <sub>a</sub> = 2.44 h <sup>-1</sup> (fixed)<br>V/F = 65.3 l<br>Cl/F = 3.9 l/h | K <sub>a</sub> = 2.4 h <sup>-1</sup><br>V/F = 8.9 L<br>Cl/F = 2.5 l/h<br>K <sub>cp</sub> = 1.8 h <sup>-1</sup><br>K <sub>pc</sub> = 0.7 h <sup>-1</sup><br>T <sub>lag</sub> = 0.5 h | K <sub>a</sub> = 4.80 h <sup>-1</sup> without food<br>K <sub>a</sub> = 2.44 h <sup>-1</sup> food intake<br>V/F = 52.7 l<br>Cl/F = 4.02 l/h | K <sub>a</sub> = 0.464 h <sup>-1</sup><br>Cl/F = 4.8 l/h<br>500 mg bid<br>Cl/F = 5.9 l/h<br>1500 mg bid<br>V: fixed to 0.753 L/kg | K <sub>a</sub> = 3.83 h <sup>-1</sup><br>V/F = 21.9 l<br>Cl/F = 2.47 l/h | K <sub>a</sub> = 1.46 h <sup>-1</sup><br>V/F = 21.5 l<br>Cl/F = 2.17 l/h |
| <b>Interindividual variability, CV %</b> | NA                                                     | IIV for k <sub>a</sub> = 32.7<br>IIV for V/F = 27.4<br>IIV for CL/F = 15.9 | IIV for k <sub>a</sub> = 139.6<br>IIV for V/F = 30.4<br>IIV for CL/F = 43.6 | IIV for V/F = 19.9<br>IIV for CL/F = 60.8                                       | IIV for k <sub>a</sub> = 84.84<br>IIV for V/F = 33.4<br>IIV for CL/F = 45.6<br>IIV for K <sub>cp</sub> = 60.2<br>IIV for K <sub>pc</sub> = 40.4<br>IIV for T <sub>lag</sub> = 134.0 | IIV for K <sub>a</sub> without food = 108<br>IIV for K <sub>a</sub> food intake = 108<br>IIV for CL/F = 19.5<br>IIV for V/F = 11.8         | IIV for k <sub>a</sub> = 63.8<br>IIV for CL/F = 24.4                                                                              | IIV for k <sub>a</sub> = 137<br>IIV for V/F = 2.65<br>IIV for CL/F = 5.9 | IIV for k <sub>a</sub> = 100<br>IIV for V/F = 19<br>IIV for CL/F = 19    |
| <b>Correlations</b>                      | NA                                                     | Between V <sub>d</sub> /F and Cl/F                                         | NA                                                                          | Between V/F και Cl/F                                                            | NA                                                                                                                                                                                  | NA                                                                                                                                         | NA                                                                                                                                | NA                                                                       | NA                                                                       |

|                   |    |                           |                        |                                                |                                                                                              |                                                                                                                                    |                                         |                                                     |                                                                                                                                         |
|-------------------|----|---------------------------|------------------------|------------------------------------------------|----------------------------------------------------------------------------------------------|------------------------------------------------------------------------------------------------------------------------------------|-----------------------------------------|-----------------------------------------------------|-----------------------------------------------------------------------------------------------------------------------------------------|
| <b>Covariates</b> | NA | Cl/F: CrCl<br>(p = 0.004) | Cl/F: CrCl<br>V/F: BSA | Cl/F: Body weight and eGFR<br>V/F: Body weight | Cl/F: urinary creatinine clearance and body surface<br>V/F: body surface<br>Ka: body surface | V <sub>d</sub> /F: Body weight, disease, valproic<br>Cl/F: Body weight, gender, Cl <sub>cr</sub> , AEDs inducers<br>P450, valproic | Cl/F: eGFR, dosing regimen, body weight | V <sub>d</sub> /F: Body weight<br>Cl/F: Body weight | K <sub>a</sub> : Age<br>V <sub>d</sub> /F: Body weight<br>Cl/F: Body weight, dosing regimen<br>Cl <sub>cr</sub> , AEDs inducers<br>P450 |
|-------------------|----|---------------------------|------------------------|------------------------------------------------|----------------------------------------------------------------------------------------------|------------------------------------------------------------------------------------------------------------------------------------|-----------------------------------------|-----------------------------------------------------|-----------------------------------------------------------------------------------------------------------------------------------------|

**Key:** ss, steady-state, IV, intravenous; V, volume of distribution, Cl, clearance; Ka, absorption rate constant; F, bioavailability fraction; Tlag, absorption lag time; IIV: interindividual variability; NA, not available

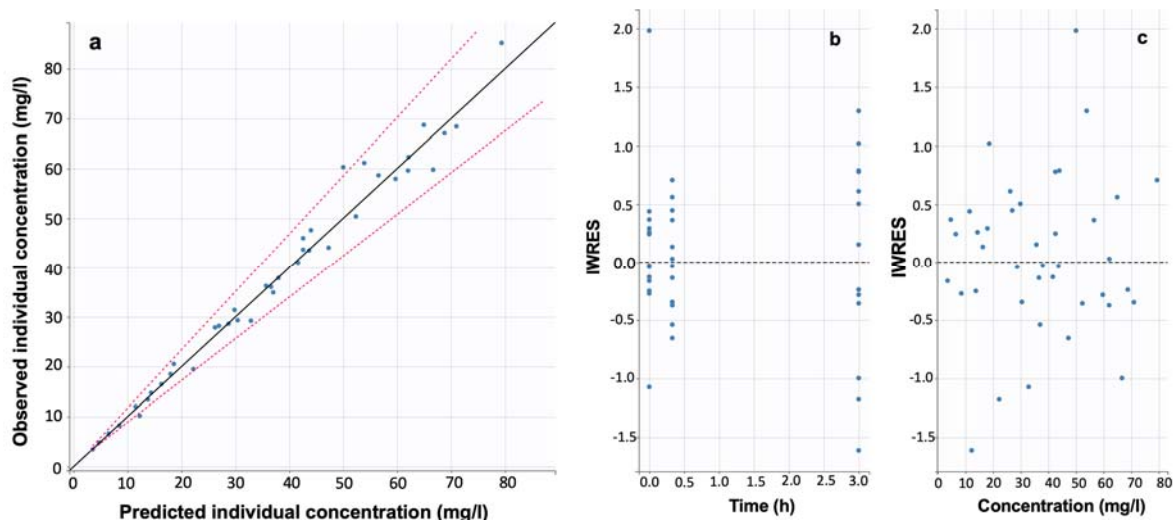

**Figure S1.** Goodness-of-fit plots for the final best model. a) Observed vs. predicted by the model individual concentrations of levetiracetam. The closed circles refer to the (predicted, observed) pairs, the solid line expresses the ideal situation of unity (i.e.,  $y = x$ ), while the dotted lines show the 90% prediction interval. b) Individual Weighted Residuals (IWRES) *versus* time, and c) Individual Weighted Residuals *versus* concentration. The dotted line represents the ideal situation of  $y = 0$ .

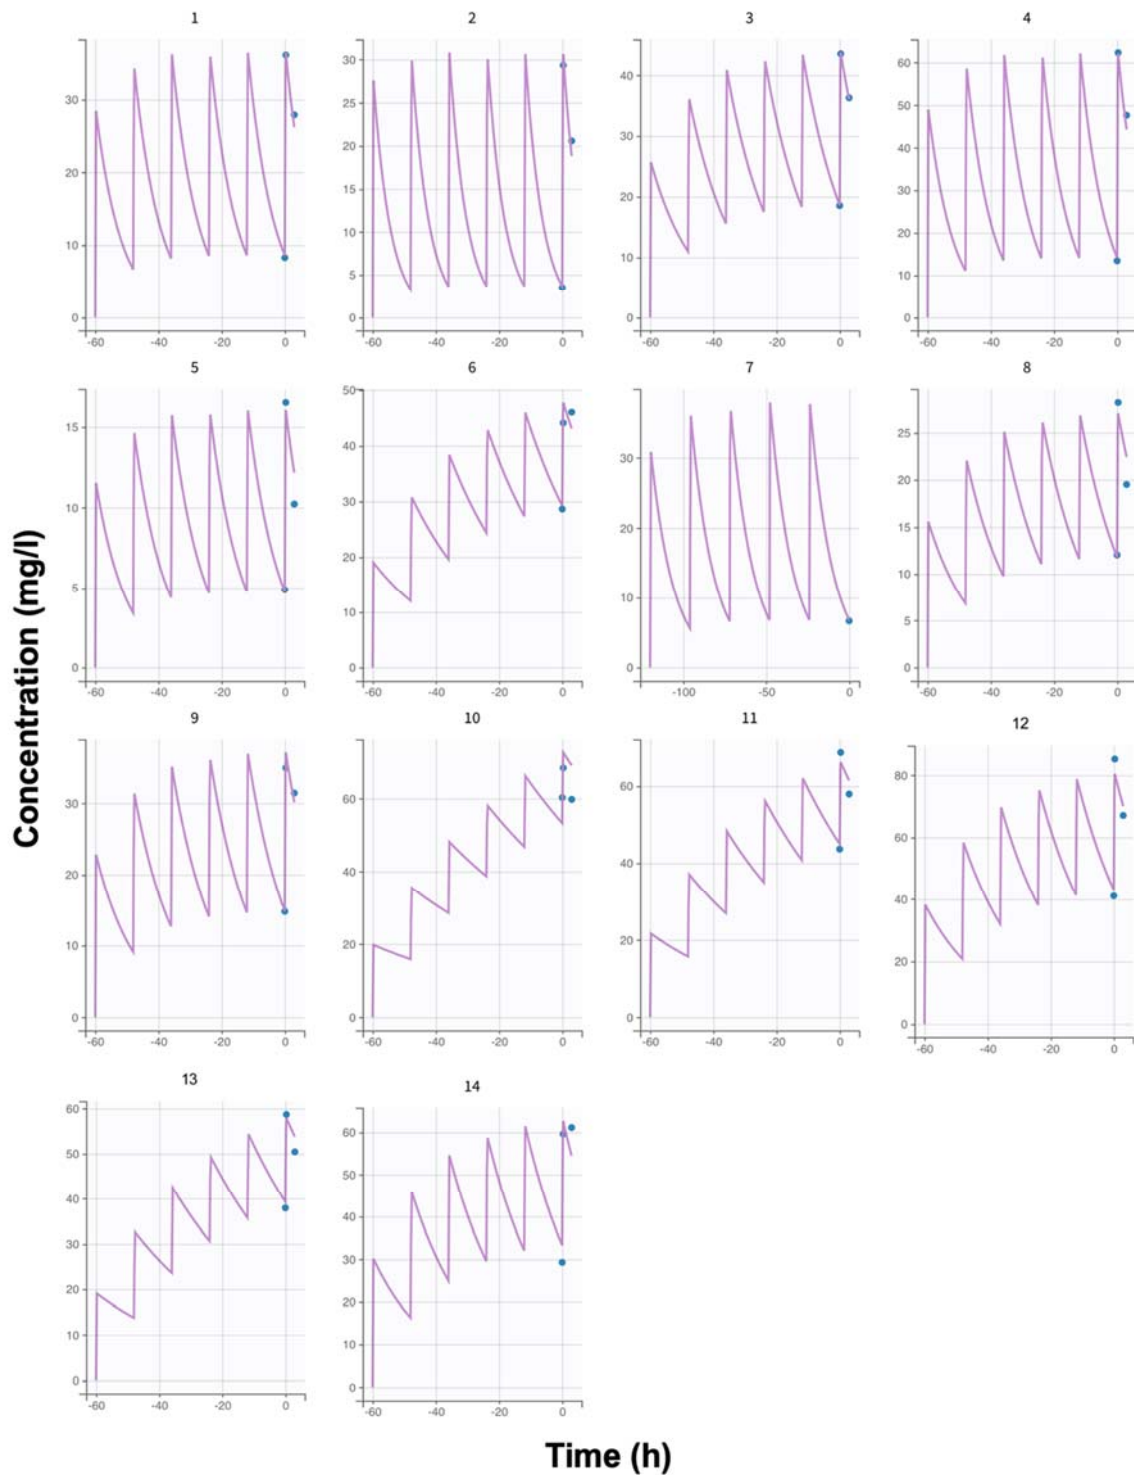

**Figure S2.** Levetiracetam concentration vs. time plots for the 14 patients of the study. Lines refer to the predicted profile by the pharmacokinetic model, whereas closed circles represent the experimental concentration data. For all subjects blood sampling was done two days after the start of administration to ensure that the serum concentration reached steady state. The duration of time (x-axis) before the sampling points, is automatically created by Monolix® and does not refer to the actual sampling time.

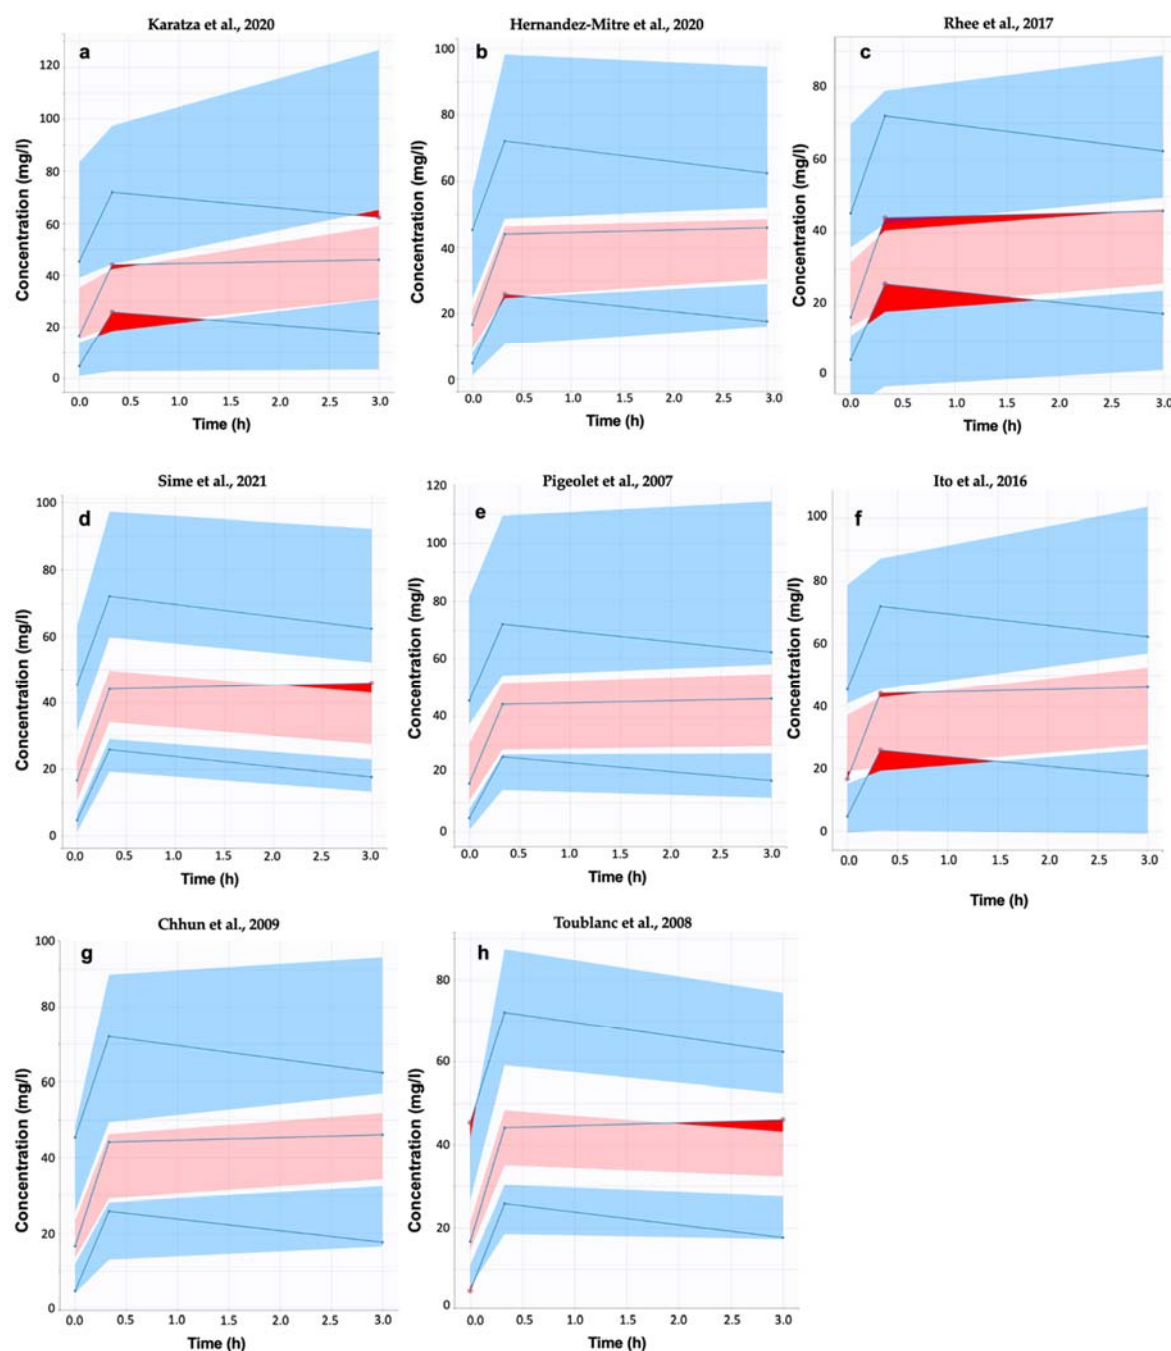

**Figure S3.** Visual predictive check plots for the literature models. The model estimates (structural model, mean model parameter, between-subject variabilities, error model) were those reported in the literature (summarized in Table S1) and were kept fixed, while the covariates were related to our study patients. Blue lines refer to the 10<sup>th</sup>, 50<sup>th</sup>, and 90<sup>th</sup> percentiles of the empirical data, and shaded areas refer to the predicted 90% confidence intervals around each zone (10<sup>th</sup>, 50<sup>th</sup>, and 90<sup>th</sup> percentiles). Observed data are shown as dots. Outliers are highlighted by red dots and areas. A number of 1,000 Monte Carlo simulations were used.

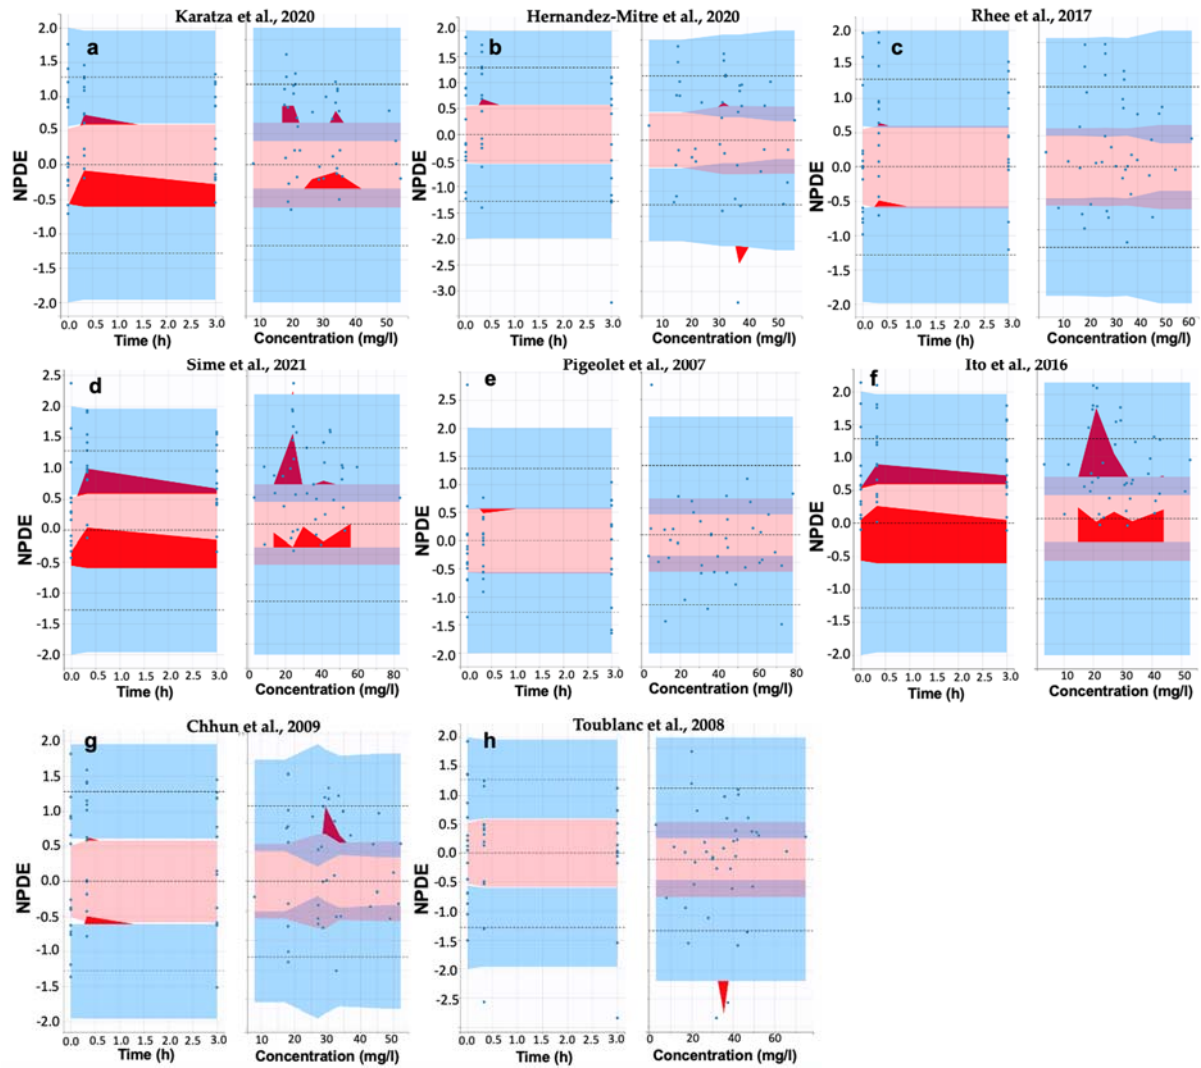

**Figure S4.** Normalized prediction distribution errors (NPDE) vs. time and concentration for the literature models. The model estimates (structural model, mean model parameter, between-subject variabilities, error model) were those reported in the literature (summarized in Table S1) and were kept fixed, while the covariates were related to our study patients. The dotted lines refer to the predicted median (at  $y = 0$ ) and the 90% predicted percentiles, while the band indicates the 90% prediction interval.
